# Supplementary material
Source: PubMed Central journal article supplement (PMC3057475)
Supplement: NIHMS232605-supplement-suppl_mat.pdf [file NIHMS232605-supplement-suppl_mat.pdf]

Online Supplement to  
 New Trends in Gender and Mathematics Performance: A Meta-Analysis  
 Sara M. Lindberg, Janet Shibley Hyde, Jennifer L. Petersen, & Marcia C. Linn  
*Psychological Bulletin*

| <b>Samples Included in Study 1</b>                                  | <b>ES</b> | <b>VR</b> |
|---------------------------------------------------------------------|-----------|-----------|
| Abdel-Khalek & Lynn (2006)                                          | -0.22     | 0.73      |
| Abedi & Lord (2001)                                                 | 0.05      | 0.97      |
| Akerman (2003)                                                      | -0.47     | 1.53      |
| Alkhateeb & Jumaa (2002)                                            | -0.51     | 0.78      |
| Alkhateeb & Jumaa (2002)                                            | -0.50     | 1.06      |
| Alkhateeb (2001)                                                    | -0.07     | 1.17      |
| Alkhateeb (2002)                                                    | 0.07      | 1.29      |
| Alkhateeb (2002)                                                    | -0.32     | 1.13      |
| Anderman & Midgley (1997)                                           | 0.04      | 1.66      |
| Arigbabu & Mji (2004)                                               | 0.10      | 1.03      |
| Arigbabu & Mji (2004)                                               | 0.14      | 1.20      |
| Arigbabu & Mji (2004)                                               | 0.36      | 2.29      |
| Atkins & Rohrbeck (1993)                                            | 0.32      | 1.23      |
| Atkins & Rohrbeck (1993)                                            | -0.54     | 0.81      |
| Aunio, Hautamäki, Heiskari, & Van Luit (2006)                       | -0.09     | 1.39      |
| Austin & Hanisch (1990)                                             | 0.19      | 1.16      |
| Badian (1999)                                                       | -0.25     |           |
| Bandalos, Yates, & ThorndikeChrist, (1995)                          | 0.08      | 1.18      |
| Battista (1990)                                                     | 0.71      | 0.76      |
| Baumert & Demmrich (2001)                                           | 0.48      |           |
| Bell, McCallum, Bryles, Driesler, McDonald, Park, & Williams (1994) | -0.32     | 0.96      |
| Bempechat, Graham, & Jimenez (1999)                                 | -0.23     |           |
| Bennett, Morley, Quardt, & Rock (2000)                              | 0.59      | 0.65      |
| Benson, Bandalos, & Hutchinson (1994)                               | 0.02      | 0.95      |
| Bibby, Lamb, Leyden, & Wood (1996)                                  | 0.72      | 2.48      |
| Bibby, Lamb, Leyden, & Wood (1996)                                  | 0.34      | 1.02      |
| Bielinski & Davison (1998)                                          | 0.04      | 1.20      |
| Bielinski & Davison (1998)                                          | 0.01      | 1.22      |
| Bielinski & Davison (1998)                                          | 0.05      | 1.19      |
| Birenbaum & Gutvirtz (1993)                                         | -0.05     | 1.10      |
| Birenbaum & Nasser (2006)                                           | -0.10     | 1.06      |
| Birenbaum & Nasser (2006)                                           | -0.01     | 1.16      |

| <b>Samples Included in Study 1</b>       | <b>ES</b> | <b>VR</b> |
|------------------------------------------|-----------|-----------|
| Birenbaum et al. (1994)                  | 0.34      | 1.28      |
| Bliwise (2005)                           | -0.56     | 1.31      |
| Bolger & Kellaghan (1990)                | 0.44      | 1.10      |
| Borg & Falzon (1995)                     | -0.36     |           |
| Borg & Falzon (1995)                     | -0.63     |           |
| Borg & Falzon (1995)                     | -0.89     |           |
| Borg (1996)                              | -0.45     |           |
| Borg, Falzon, & Sammut (1995)            | 0.02      |           |
| Bornholt, Goodnow, & Cooney (1994)       | -0.07     | 1.05      |
| Bornholt, Goodnow, & Cooney (1994)       | 0.20      | 1.04      |
| Bornholt, Goodnow, & Cooney (1994)       | 0.00      | 1.13      |
| Bornholt, Goodnow, & Cooney (1994)       | 0.27      | 1.07      |
| Brennan, Wenz-Gross, & Siperstein (2001) | 0.19      | 0.80      |
| Bridgeman & Wendler (1991)               | 0.02      | 1.07      |
| Bridgeman & Wendler (1991)               | -0.05     | 1.13      |
| Bridgeman & Wendler (1991)               | -0.24     | 0.89      |
| Bridgeman & Wendler (1991)               | -0.16     | 0.69      |
| Bridgeman & Wendler (1991)               | -0.21     | 0.87      |
| Bridgeman & Wendler (1991)               | 0.35      | 1.35      |
| Bridgeman & Wendler (1991)               | -0.03     | 0.74      |
| Bridgeman & Wendler (1991)               | -0.36     | 0.83      |
| Bridgeman & Wendler (1991)               | 0.00      | 1.14      |
| Bridgeman, Harvey, & Braswell (1995)     | 0.35      | 1.20      |
| Bridgeman, Harvey, & Braswell (1995)     | 0.29      | 1.06      |
| Bridgeman, Harvey, & Braswell (1995)     | 0.30      | 1.07      |
| Bridgeman, Harvey, & Braswell (1995)     | 0.22      | 1.61      |
| Bridgeman, Harvey, & Braswell (1995)     | 0.06      | 1.20      |
| Bridgeman, Harvey, & Braswell (1995)     | 0.06      | 1.17      |
| Bridgeman, Harvey, & Braswell (1995)     | 0.27      | 0.81      |
| Bridgeman, Harvey, & Braswell (1995)     | 0.06      | 1.00      |
| Bruce & Lawrenz (1991)                   | 0.40      |           |
| Bull & Johnston (1997)                   | 0.00      |           |
| Busato, ten Dam, & van den Eeden (1995)  | -0.20     | 0.92      |
| Busato, ten Dam, & van den Eeden (1995)  | -0.13     | 1.09      |
| Byrnes & Takahira (1993)                 | 0.41      |           |
| Byrnes & Takahira (1994)                 | 0.00      |           |
| Byrnes, Hong, & Xing (1997)              | 0.43      | 0.71      |
| Byrnes, Hong, & Xing (1997)              | 0.25      | 0.98      |
| Campbell, Schellinger, & Beer (1991)     | -0.16     | 0.98      |
| Cankoy & Tut (2005)                      | -0.07     | 1.07      |

| <b>Samples Included in Study 1</b>     | <b>ES</b> | <b>VR</b> |
|----------------------------------------|-----------|-----------|
| Cardelle-Elawar (1990)                 | 0.30      | 0.80      |
| Cardelle-Elawar (1990)                 | -0.09     | 1.62      |
| Chan (2001)                            | 0.43      | 1.23      |
| Chen (2002)                            | 0.28      | 1.09      |
| Cherian & Cherian (1995)               | 1.27      | 0.12      |
| Cherian & Cherian (1995)               | 0.10      | 0.13      |
| Cherian & Cherian (1995)               | 0.42      | 2.13      |
| Cherian & Cherian (1995)               | 0.13      | 0.73      |
| Cherian (1993)                         | 0.44      | 0.22      |
| Cherian (1993)                         | -0.33     | 0.93      |
| Cherian (1993)                         | 0.44      | 0.88      |
| Chipman, Marshall, & Scott (1991)      | 0.81      |           |
| Clariana & Schultz (1993)              | -0.62     | 1.17      |
| Clariana & Schultz (1993)              | -0.67     | 0.71      |
| Collaer & Hill (2006)                  | 1.16      | 0.78      |
| Collaer & Hill (2006)                  | 0.19      | 2.52      |
| Collaer & Hill (2006)                  | 1.28      | 1.27      |
| Collaer & Hill (2006)                  | 0.81      | 0.30      |
| Connors (1995)                         | 0.03      | 1.07      |
| Connors (1995)                         | -0.05     | 1.00      |
| Crosser (1991)                         | -0.43     | 0.80      |
| Crosser (1991)                         | -0.11     | 1.47      |
| Davies & Brember (1999)                | 0.10      | 1.14      |
| Davis & Carr (2001)                    | -0.03     | 0.92      |
| Davis-Dorsey, Ross, & Morrison, (1991) | -0.79     |           |
| De Brauwer, Verguts, & Fias (2006)     | -0.05     |           |
| De Brauwer, Verguts, & Fias (2006)     | 0.05      |           |
| De Brauwer, Verguts, & Fias (2006)     | -0.14     |           |
| De Lisle, Smith, & Jules (2005)        | -0.24     | 1.18      |
| De Lisle, Smith, & Jules (2005)        | -0.14     | 1.13      |
| De Lisle, Smith, & Jules (2005)        | -0.23     | 1.25      |
| DeMars (1998)                          | 0.00      |           |
| DeMars (1998)                          | 0.01      |           |
| Diamante (1993)                        | 0.32      | 0.75      |
| Dickhäuser & Meyer (2006)              | 0.06      | 1.16      |
| Duffy, Gunther, & Walters (1997)       | -0.55     | 1.67      |
| Eid & Koushki (2005)                   | 0.21      | 0.91      |
| Eid & Koushki (2005)                   | 0.42      | 0.99      |
| El Hassan (2001)                       | 0.12      | 1.00      |
| El Hassan (2001)                       | 0.05      | 0.90      |

| <b>Samples Included in Study 1</b>                                        | <b>ES</b> | <b>VR</b> |
|---------------------------------------------------------------------------|-----------|-----------|
| Elliott (1990)                                                            | -0.09     | 0.84      |
| Elliott (1990)                                                            | -0.36     | 1.11      |
| Entwisle, Alexander, & Olson (1994)                                       | -0.07     | 1.45      |
| Evans, Schweingruber, & Stevenson (2002)                                  | 0.19      | 1.19      |
| Evans, Schweingruber, & Stevenson (2002)                                  | 0.90      | 1.94      |
| Evans, Schweingruber, & Stevenson (2002)                                  | 0.46      | 1.11      |
| Ewers & Wood (1993)                                                       | -0.24     | 1.67      |
| Ewers & Wood (1993)                                                       | 0.06      | 1.10      |
| Feldman, Gutfreund, & Yerushalmi (1998)                                   | 0.69      | 0.87      |
| Fennema, Carpenter, & Jacobs (1998)                                       | -0.10     | 1.01      |
| Fink, Brookes, Neave, Manning, & Geary (2006)                             | 0.28      | 1.42      |
| Fischbein (1990)                                                          | 0.34      | 0.96      |
| Fischbein (1990)                                                          | -0.11     | 1.05      |
| Fischbein (1990)                                                          | 0.08      | 1.09      |
| Fischbein (1990)                                                          | 0.62      | 1.04      |
| Fischbein (1990)                                                          | -0.04     | 1.13      |
| Fischbein (1990)                                                          | 0.39      | 1.03      |
| Fuller, Hua, & Snyder (1994)                                              | -0.06     | 1.13      |
| Gallagher, De Lisi, Holst, McGillicuddy-De Lisi, Morely, & Cahalan (2000) | 0.94      | 0.64      |
| Gallagher, De Lisi, Holst, McGillicuddy-De Lisi, Morely, & Cahalan (2000) | 0.62      | 0.49      |
| Galler, Ramsey, Harrison, Taylor, Cumberbatch, & Forde (2004)             | -0.05     | 1.21      |
| Garner & Engelhard (1999)                                                 | 0.11      | 1.02      |
| Geary, Salthouse, Chen, & Fan (1996)                                      | 0.00      |           |
| Geary, Salthouse, Chen, & Fan (1996)                                      | 0.00      |           |
| Geary, Salthouse, Chen, & Fan (1996)                                      | 0.00      |           |
| Geary, Salthouse, Chen, & Fan (1996)                                      | 0.00      |           |
| Geary, Saults, Liu, & Hoard (2000)                                        | 0.30      | 1.14      |
| Gilbert (2000)                                                            | 0.13      | 0.82      |
| Glutting, Oh, Ward, & Ward (2000)                                         | 0.32      | 1.07      |
| Gottesman, Bennett, Nathan, & Kelly (1996)                                | 0.00      | 1.13      |
| Gouchie & Kimura (1991)                                                   | 0.65      | 1.35      |
| Gresky, Eyck, Lord, & McIntyre (2005)                                     | 1.11      | 2.26      |
| Gresky, Eyck, Lord, & McIntyre (2005)                                     | 0.04      | 1.03      |
| Gresky, Eyck, Lord, & McIntyre (2005)                                     | 0.87      | 2.06      |
| Gresky, Eyck, Lord, & McIntyre (2005)                                     | 0.27      | 0.37      |
| Gresky, Eyck, Lord, & McIntyre (2005)                                     | -0.17     | 0.54      |
| Gresky, Eyck, Lord, & McIntyre (2005)                                     | -0.33     | 0.00      |
| Grewal (1998)                                                             | 0.01      | 2.17      |
| Halat (2006)                                                              | 0.07      | 0.97      |
| Hall, Davis, Bolen, & Chia (1999)                                         | 0.27      | 0.49      |

| <b>Samples Included in Study 1</b>                                      | <b>ES</b> | <b>VR</b> |
|-------------------------------------------------------------------------|-----------|-----------|
| Hall, Davis, Bolen, & Chia (1999)                                       | -0.02     | 0.80      |
| Hay, Ashman, & van Kraayenoord (1998)                                   | -0.27     | 1.81      |
| Hein, Bzufka, & Neumarker (2000)                                        | 0.48      | 1.96      |
| Held, Alderton, Foley, & Segall (1993)                                  | -0.28     | 1.12      |
| Helwig, Anderson, & Tindal (2001)                                       | 0.14      | 1.16      |
| Helwig, Anderson, & Tindal (2001)                                       | 0.11      | 1.39      |
| Ho, Senturk, Lam, Zimmer, Hong, Okamoto, Chiu, Nakazawa, & Wang (2005)  | -0.16     | 0.76      |
| Ho, Senturk, Lam, Zimmer, Hong, Okamoto, Chiu, Nakazawa, & Wang (2005)  | 0.14      | 0.87      |
| Ho, Senturk, Lam, Zimmer, Hong, Okamoto, Chiu, Nakazawa, & Wang (2005)  | -0.35     | 0.91      |
| Ho, Eastman, & Catrambone (2006)                                        | 0.20      | 0.94      |
| Hong & Aqui (2004)                                                      | 0.25      | 1.93      |
| Hong & Aqui (2004)                                                      | 0.84      | 1.00      |
| Hong & Aqui (2004)                                                      | -1.22     | 1.14      |
| Hosenfeld, Koller, & Baumert (1999)                                     | 0.02      | 1.08      |
| Hosenfeld, Koller, & Baumert (1999)                                     | 0.17      | 1.25      |
| Hosenfeld, Koller, & Baumert (1999)                                     | 0.34      | 0.83      |
| Huang (1993)                                                            | -0.02     | 0.99      |
| Iben (1991)                                                             | -0.06     | 1.63      |
| Iben (1991)                                                             | -0.66     | 1.27      |
| Iben (1991)                                                             | -0.38     | 1.86      |
| Iben (1991)                                                             | -0.14     | 1.30      |
| Iben (1991)                                                             | 0.00      | 1.30      |
| Isiksal & Askar (2005)                                                  | 0.05      | 1.39      |
| Jinabhai, Taylor, Rangongo, Mkhize, Anderson, Pillay, & Sullivan (2004) | 0.13      | 0.97      |
| Jones & Rowsey (1990)                                                   | 0.26      |           |
| Kahn (2005)                                                             | 0.28      |           |
| Kahn (2005)                                                             | 0.25      |           |
| Kaiser (1994)                                                           | 0.37      | 0.59      |
| Kaiser (1994)                                                           | 0.12      | 0.96      |
| Kaiser (1994)                                                           | -0.02     | 1.33      |
| Kass & Fish (1991)                                                      | 0.00      |           |
| Kee, Gottfried, & Bathurst (1991)                                       | 0.24      | 1.28      |
| Kee, Gottfried, & Bathurst (1991)                                       | 0.20      | 1.29      |
| Keller (2002)                                                           | 0.37      | 1.21      |
| Keller (2002)                                                           | 1.09      | 0.53      |
| Kelly-Vance, Caster, & Ruane (2000)                                     | -0.01     | 1.10      |
| Kelly-Vance, Caster, & Ruane (2000)                                     | -0.11     | 0.62      |

| <b>Samples Included in Study 1</b>                      | <b>ES</b> | <b>VR</b> |
|---------------------------------------------------------|-----------|-----------|
| Kenney-Benson, Pomerantz, Ryan, & Patrick (2006)        | 0.02      | 0.64      |
| Kiger (2005)                                            | 0.04      | 1.20      |
| Kiger (2005)                                            | 0.26      | 0.69      |
| Kimura (1994)                                           | 0.27      | 1.00      |
| Kloosterman (1991)                                      | 0.02      | 1.12      |
| Koizumi (1992)                                          | 0.35      |           |
| Kontrová, Palkovicová, & Árochová (1991)                | 0.09      | 1.21      |
| Kontrová, Palkovicová, & Árochová (1991)                | -2.17     | 2.25      |
| Kumar & Harizuka (1998)                                 | 0.21      | 2.70      |
| Kumar & Harizuka (1998)                                 | -0.14     | 2.08      |
| Kwok & Lytton (1996)                                    | 0.25      | 0.95      |
| Kwok & Lytton (1996)                                    | -0.09     | 1.38      |
| Lachance & Mazzocco (2006)                              | 0.04      | 1.45      |
| Lagace, Kutcher, & Robertson (2003)                     | 0.64      | 0.78      |
| Lakes & Hoyt (2004)                                     | 0.39      | 1.39      |
| Landgren, Kjellman, & Gillberg (2003)                   | -0.13     | 1.09      |
| Lau & Leung (1992)                                      | -0.08     |           |
| LeFevre, Kulak, & Heymans (1992)                        | 0.07      | 1.42      |
| Leonard (2001)                                          | 0.14      | 2.56      |
| Leonard (2001)                                          | -0.03     | 0.68      |
| Lesko & Corpus (2006)                                   | 0.47      | 1.02      |
| Lim (1994)                                              | 0.31      | 0.74      |
| Lindblad, Lindahl, Theorell, & von Scheele (2006)       | 0.75      | 1.30      |
| Lindblad, Lindahl, Theorell, & von Scheele (2006)       | 0.39      | 1.77      |
| Lindsay & Desforges (1999)                              | -0.25     | 1.07      |
| Lloyd, Walsh, & Yailagh (2005)                          | -0.17     | 0.99      |
| López & Sullivan (1991)                                 | -0.67     | 0.75      |
| Lopez & Sullivan (1992)                                 | -0.10     | 0.80      |
| Lopez-Sobaler, Ortega, Quintas, Navia, & Requejo (2003) | 0.02      | 1.05      |
| Low & Over (1993)                                       | 0.41      | 0.95      |
| Low & Over (1993)                                       | 0.26      | 0.73      |
| Low & Over (1993)                                       | 0.29      | 1.13      |
| Low & Over (1993)                                       | 0.50      | 0.76      |
| Lowrie & Kay (2001)                                     | 0.19      | 0.89      |
| Lubinski & Humphreys (1990)                             | 0.19      | 1.17      |
| Lubinski & Humphreys (1990)                             | 1.79      | 0.61      |
| Lummis & Stevenson (1990)                               | 0.23      | 1.54      |
| Lummis & Stevenson (1990)                               | 0.09      | 1.09      |
| Lummis & Stevenson (1990)                               | 0.00      | 1.08      |
| Lummis & Stevenson (1990)                               | -0.07     | 1.00      |

| <b>Samples Included in Study 1</b>                        | <b>ES</b> | <b>VR</b> |
|-----------------------------------------------------------|-----------|-----------|
| Lummis & Stevenson (1990)                                 | 0.02      | 1.36      |
| Lummis & Stevenson (1990)                                 | 0.02      | 1.00      |
| Lummis & Stevenson (1990)                                 | 0.03      | 1.06      |
| Lummis & Stevenson (1990)                                 | 0.15      | 0.82      |
| Lummis & Stevenson (1990)                                 | -0.09     | 1.71      |
| Lummis & Stevenson (1990)                                 | 0.04      | 1.05      |
| Lummis & Stevenson (1990)                                 | -0.19     | 1.12      |
| Lummis & Stevenson (1990)                                 | 0.03      | 1.12      |
| Lummis & Stevenson (1990)                                 | 0.06      | 0.79      |
| Lummis & Stevenson (1990)                                 | 0.19      | 1.21      |
| Lummis & Stevenson (1990)                                 | -0.05     | 0.93      |
| Lyons & Schneider (2005)                                  | 0.88      | 1.41      |
| Manger & Eikeland (1996)                                  | 0.17      |           |
| Manger & Eikeland (1998)                                  | 0.24      | 1.13      |
| Manger & Eikeland (1998)                                  | 0.17      | 1.11      |
| Manger & Eikeland (1998)                                  | 0.21      | 1.15      |
| Manger & Gjestad (1997)                                   | 0.17      | 0.83      |
| Manger & Gjestad (1997)                                   | 0.22      | 0.81      |
| Manger & Gjestad (1997)                                   | 0.21      | 0.91      |
| Manger (1995)                                             | 0.16      | 0.84      |
| Maqsd & Khalique (1991)                                   | 0.44      | 1.28      |
| Maqsd & Rouhani (1991)                                    | 0.53      | 1.01      |
| Maqsd (1997)                                              | 0.57      | 0.60      |
| Maqsd (1997)                                              | 0.15      | 2.28      |
| Maqsd (1997)                                              | 0.12      | 0.58      |
| Maqsd (1997)                                              | 0.94      | 1.40      |
| Maree & Erasmus (2006)                                    | -0.16     | 0.93      |
| Matthews (1997)                                           | 0.23      |           |
| Mboya (1998)                                              | 0.17      | 1.36      |
| McCoy (2005)                                              | 0.20      | 0.95      |
| McKenzie, Bull, & Gray (2003)                             | 0.88      |           |
| McIntyre, Lord, Gresky, Ten Eyck, Jay Frye, & Bond (2005) | -0.06     | 1.16      |
| McIntyre, Lord, Gresky, Ten Eyck, Jay Frye, & Bond (2005) | -0.06     | 1.19      |
| McIntyre, Lord, Gresky, Ten Eyck, Jay Frye, & Bond (2005) | 0.05      | 1.01      |
| McIntyre, Lord, Gresky, Ten Eyck, Jay Frye, & Bond (2005) | 0.16      | 0.71      |
| McIntyre, Lord, Gresky, Ten Eyck, Jay Frye, & Bond (2005) | 0.28      | 1.81      |
| McNiece & Jolliffe (1998)                                 | 0.29      | 0.22      |
| Medina (1993)                                             | 0.00      |           |
| Miller & Crouch (1991)                                    | 0.69      | 0.94      |
| Miller & Crouch (1991)                                    | -0.19     | 2.44      |

| <b>Samples Included in Study 1</b>         | <b>ES</b> | <b>VR</b> |
|--------------------------------------------|-----------|-----------|
| Miller & Crouch (1991)                     | 0.00      | 0.73      |
| Mills, Ablard, & Gustin (1994)             | 0.19      | 1.27      |
| Mills, Ablard, & Stumpf (1993)             | 0.42      | 2.32      |
| Mills, Ablard, & Stumpf (1993)             | 0.46      | 1.32      |
| Mills, Ablard, & Stumpf (1993)             | 0.41      | 1.24      |
| Mills, Ablard, & Stumpf (1993)             | 0.52      | 1.37      |
| Mills, Ablard, & Stumpf (1993)             | 0.40      | 1.37      |
| Mohsin, Nath, & Chowdhury (1996)           | 0.34      |           |
| Moodaley, Grobler, & Lens (2006)           | 0.08      | 0.76      |
| Morrison, Griffith, & Alberts (1997)       | 0.32      |           |
| Murphy & Ross (1990)                       | -0.44     | 0.89      |
| Murphy & Ross (1990)                       | -0.36     | 0.95      |
| Murphy & Ross (1990)                       | -0.74     | 0.74      |
| Murphy & Ross (1990)                       | -0.19     | 1.01      |
| Murphy & Ross (1990)                       | -0.39     | 1.86      |
| Murphy & Ross (1990)                       | -0.37     | 1.14      |
| Mwamwenda (2002)                           | -0.25     | 5.96      |
| Narciss & Huth (2006)                      | 0.09      | 1.18      |
| Nasser & Birenbaum (2005)                  | -0.13     | 1.40      |
| Nasser & Birenbaum (2005)                  | 0.20      | 1.08      |
| Nelson, Benner, Lane, & Smith (2004)       | 0.09      | 0.70      |
| Nyangeni & Glencross (1997)                | 0.26      | 1.37      |
| Olszewski-Kubilius & Turner (2002)         | 0.26      |           |
| Olszewski-Kubilius & Turner (2002)         | 0.32      |           |
| Olszewski-Kubilius & Turner (2002)         | 0.23      |           |
| Onatsu-Arvilommi & Nurmi (2000)            | 0.39      | 1.49      |
| O'Neil, Abedi, & Miyoshi (2005)            | 0.46      | 1.50      |
| Ong, Allison, & Haladyna (2000)            | -0.20     | 1.13      |
| Opyene-Eluk, & Opolot-Okurut (1995)        | 0.15      | 1.34      |
| Pajares & Miller (1994)                    | 0.37      |           |
| Pajares & Miller (1997)                    | 0.03      | 1.14      |
| Pajares (1996)                             | -0.19     |           |
| Panchon & Terol (1994)                     | -0.92     | 1.08      |
| Park & Bauer (1999)                        | -0.01     | 1.01      |
| Park & Bauer (1999)                        | 0.02      | 1.15      |
| Park & Bauer (1999)                        | 0.05      | 1.07      |
| Park & Bauer (1999)                        | -0.04     | 0.91      |
| Park, Bauer, & Sullivan (1998)             | 0.00      | 1.02      |
| Park, Bauer, & Sullivan (1998)             | 0.04      | 1.04      |
| Pascarella, Bohr, Nora, & Terenzini (1995) | 0.20      | 1.08      |



| <b>Samples Included in Study 1</b>              | <b>ES</b> | <b>VR</b> |
|-------------------------------------------------|-----------|-----------|
| Pascarella, Bohr, Nora, & Terenzini (1995)      | 0.30      | 1.20      |
| Pehkonen (1997)                                 | 0.17      | 1.08      |
| Pigg, Waliczek, & Zajicek (2006)                | 0.06      | 1.03      |
| Pomplun & Capps (1999)                          | -0.17     | 0.88      |
| Pomplun & Capps (1999)                          | 0.22      | 1.27      |
| Pope, Wentzel, Braden, & Anderson (2006)        | 0.06      |           |
| Pope, Wentzel, Braden, & Anderson (2006)        | 0.10      |           |
| Pope, Wentzel, Braden, & Anderson (2006)        | 0.15      |           |
| Pope, Wentzel, Braden, & Anderson (2006)        | 0.14      |           |
| Pope, Wentzel, Braden, & Anderson (2006)        | 0.05      |           |
| Pope, Wentzel, Braden, & Anderson (2006)        | 0.08      |           |
| Pope, Wentzel, Braden, & Anderson (2006)        | 0.10      |           |
| Pope, Wentzel, Braden, & Anderson (2006)        | 0.07      |           |
| Pope, Wentzel, Braden, & Anderson (2006)        | 0.02      |           |
| Pope, Wentzel, Braden, & Anderson (2006)        | 0.04      |           |
| Quinn & Spencer (2001)                          | 0.37      |           |
| Quinn & Spencer (2001)                          | -0.20     |           |
| Quinn & Spencer (2001)                          | 0.65      |           |
| Rammstedt & Rammsayer (2002)                    | 0.48      | 1.34      |
| Rammstedt & Rammsayer (2002)                    | 0.71      | 1.92      |
| Randhawa & Hunter (2001)                        | 0.19      |           |
| Randhawa & Randhawa (1993)                      | 0.25      |           |
| Randhawa (1994)                                 | 0.29      | 1.19      |
| Reynolds, Mehana, & Temple (1995)               | -0.49     | 0.93      |
| Reynolds, Mehana, & Temple (1995)               | -0.23     | 1.11      |
| Reys, Reys, & Nohda (1991)                      | 0.25      | 0.91      |
| Reys, Reys, & Nohda (1991)                      | 0.17      | 1.53      |
| Reys, Reys, & Nohda (1995)                      | 0.34      | 1.10      |
| Reys, Reys, & Nohda (1995)                      | 0.28      | 1.11      |
| Reys, Reys, & Nohda (1995)                      | 0.09      | 1.50      |
| Reys, Reys, & Nohda (1995)                      | 0.25      | 1.08      |
| Robinson, Abbott, & Berninger (1996)            | 0.27      | 1.56      |
| Robinson, Abbott, & Berninger (1996)            | 0.10      | 1.23      |
| Rosselli, Ardila, Bateman, Guzman (2001)        | -0.04     | 0.86      |
| Rouxel (2000)                                   | 0.12      | 1.08      |
| Rouxel (2001)                                   | 0.12      | 1.08      |
| Rudnitsky, Etheredge, Freeman, & Gilbert (1995) | -0.47     | 0.70      |
| Rudnitsky, Etheredge, Freeman, & Gilbert (1995) | -0.81     | 0.31      |
| Rudnitsky, Etheredge, Freeman, & Gilbert (1995) | 0.02      | 1.13      |
| Rudnitsky, Etheredge, Freeman, & Gilbert (1995) | -0.82     | 0.94      |

| <b>Samples Included in Study 1</b>              | <b>ES</b> | <b>VR</b> |
|-------------------------------------------------|-----------|-----------|
| Rudnitsky, Etheredge, Freeman, & Gilbert (1995) | 0.28      | 1.51      |
| Rudnitsky, Etheredge, Freeman, & Gilbert (1995) | 0.11      | 1.13      |
| Ruthven (1990)                                  | -0.23     |           |
| Saigal, Lambert, Russ, & Hoult (2002)           | -1.82     | 1.26      |
| Salawu (1993)                                   | 0.28      | 1.41      |
| Salerno (1995)                                  | 0.06      | 0.79      |
| Salerno (1995)                                  | 0.57      | 1.85      |
| Salerno (1995)                                  | 0.32      | 1.59      |
| Sappington, Larsen, Martin, & Murphy (1991)     | -0.37     | 0.73      |
| Sarouphim (2004)                                | 0.27      | 0.94      |
| Schellinger & Beer (1991)                       | -0.05     | 1.58      |
| Seegers & Boekaerts (1996)                      | 0.40      | 1.10      |
| Sekaquaptewa & Thompson (2003)                  | -0.33     | 1.79      |
| Sekaquaptewa & Thompson (2003)                  | 0.22      | 1.39      |
| Shannon & Allen (1998)                          | -0.08     | 1.49      |
| Shannon & Allen (1998)                          | -0.20     | 1.04      |
| Sheehan & Gray (1992)                           | -0.06     | 1.11      |
| Shibley & Milakofsky (2003)                     | 0.71      | 0.65      |
| Shibley & Milakofsky (2003)                     | 0.34      | 0.72      |
| Shymansky, Yore, & Anderson (2004)              | 0.24      | 1.04      |
| Skaalvik & Rankin (1990)                        | 0.04      | 1.22      |
| Skaalvik & Rankin (1994)                        | 0.05      | 1.24      |
| Skaalvik & Rankin (1994)                        | 0.19      | 1.01      |
| Skaggs & Lissitz (1992)                         | 0.02      | 1.24      |
| Skaggs & Lissitz (1992)                         | 0.05      | 0.97      |
| Skaggs & Lissitz (1992)                         | 0.10      | 1.16      |
| Skaggs & Lissitz (1992)                         | 0.01      | 0.97      |
| Slate, Jones, Turnbough, & Bauschlicher (1994)  | -0.02     | 1.47      |
| Slate, Jones, Turnbough, & Bauschlicher (1994)  | -0.12     | 1.25      |
| Slate, Jones, Turnbough, & Bauschlicher (1994)  | -0.34     | 0.96      |
| Smees, Sammons, Thomas, & Mortimore (2002)      | -0.06     | 0.83      |
| Smees, Sammons, Thomas, & Mortimore (2002)      | -0.03     | 1.02      |
| Smith & White (2001)                            | 0.70      | 1.06      |
| Smith & White (2001)                            | 0.35      | 0.69      |
| Spencer, Steele, & Quinn (1999)                 | 0.61      |           |
| Spencer, Steele, & Quinn (1999)                 | 0.53      |           |
| Spencer, Steele, & Quinn (1999)                 | 0.64      |           |
| Srivastava (1993)                               | -0.06     | 1.87      |
| Stage & Kloosterman (1995)                      | -0.10     | 1.41      |
| Standing, Sproule, & Leung (2006)               | 0.04      |           |

| <b>Samples Included in Study 1</b>              | <b>ES</b> | <b>VR</b> |
|-------------------------------------------------|-----------|-----------|
| Stevenson, Chen, & Booth (1990)                 | 0.04      | 1.15      |
| Stevenson, Chen, & Booth (1990)                 | 0.09      | 1.47      |
| Stevenson, Chen, & Booth (1990)                 | 0.27      | 1.22      |
| Stricker & Ward (2004)                          | 0.44      | 1.00      |
| Stricker & Ward (2004)                          | 0.16      | 1.00      |
| Stricker & Ward (2004)                          | 0.30      | 1.00      |
| Stricker & Ward (2004)                          | 0.18      | 1.00      |
| Stumpf & Haldimann (1997)                       | 0.04      | 1.36      |
| Subotnik & Strauss (1995)                       | 0.49      | 0.66      |
| Subotnik & Strauss (1995)                       | 0.70      | 0.62      |
| Swiatek, Lupkowski-Shopluk, & O'Donoghue (2000) | 0.16      |           |
| Tartre & Fennema (1995)                         | 0.39      | 0.69      |
| Taylor (1999)                                   | 0.28      | 1.10      |
| Taylor (1999)                                   | -0.21     | 1.66      |
| Thompson et al. (1992)                          | 0.47      | 0.86      |
| Thompson et al. (1992)                          | -0.03     | 2.00      |
| Tiedemann & Faber (1992)                        | -0.51     |           |
| Travis & Lennon (1997)                          | -0.62     | 1.59      |
| Travis & Lennon (1997)                          | -0.60     | 1.55      |
| Tsui & Rich (2002)                              | 0.04      | 1.00      |
| Undheim, Nordvik, Gustafsson, & Undheim (1995)  | 0.99      | 0.56      |
| Valanides (1996)                                | 0.00      |           |
| VanDerHeyden, Broussard, & Cooley (2006)        | -0.32     | 0.67      |
| Vermeer, Boekaerts, & Seegers (2000)            | 0.30      | 0.93      |
| Walsh, Hickey, & Duffy (1999)                   | 0.50      | 1.00      |
| Wang & Lane (1996)                              | 0.00      | 1.05      |
| Wang & Lane (1996)                              | -0.20     | 1.01      |
| Wang & Lane (1996)                              | -0.02     | 0.98      |
| Wang & Lane (1996)                              | -0.05     | 1.14      |
| Wangu & Thomas (1995)                           | 0.24      | 2.45      |
| Warwick & Jatoi (1994)                          | 0.28      | 0.80      |
| Warwick & Jatoi (1994)                          | 0.27      | 0.80      |
| Warwick & Jatoi (1994)                          | 0.40      | 0.94      |
| Warwick & Jatoi (1994)                          | 0.38      | 0.94      |
| Watt & Bornholt (2000)                          | -0.21     | 1.43      |
| Watt (2000)                                     | 0.56      | 2.03      |
| Watt (2006)                                     | -0.08     | 1.15      |
| Werdelin (1996)                                 | -0.34     |           |
| Werdelin (1996)                                 | -0.51     |           |
| Werdelin (1996)                                 | -0.42     |           |

---

| <b>Samples Included in Study 1</b>               | <b>ES</b> | <b>VR</b> |
|--------------------------------------------------|-----------|-----------|
| Werdelin (1996)                                  | -0.15     |           |
| Williams & Montgomery (1995)                     | 0.13      | 1.04      |
| Witt, Dunbar, & Hoover (1994)                    | 0.01      | 0.87      |
| Wu & Greenan (2003)                              | 0.70      | 0.76      |
| Wu & Greenan (2003)                              | 0.43      | 0.56      |
| Xu & Farrell (1992)                              | 0.05      | 2.16      |
| Xu & Farrell (1992)                              | -0.06     | 1.48      |
| Xu & Farrell (1992)                              | 0.35      | 1.36      |
| Xu & Farrell (1992)                              | 0.43      | 0.89      |
| Yadrick, Regian, RobertsonSchule, & Gomez (1996) | -0.18     | 1.06      |
| Zervas (1990)                                    | 0.39      | 0.87      |

---
